# Supplementary material for: Increased open circuit voltage in a fluorinated quinoxaline-based alternating conjugated polymer
Source: Royal Society of Chemistry journal article supplement (doi:10.1039/c2py20798b), 2012-11-26
Supplement: c2py20798b.pdf [file c2py20798b.pdf]

# Increased Open Circuit Voltage in Fluorinated Quinoxaline- based Alternating Conjugated Polymer

Chih-Ping Chen, Yi-Chun Chen, Chao-Ying Yu

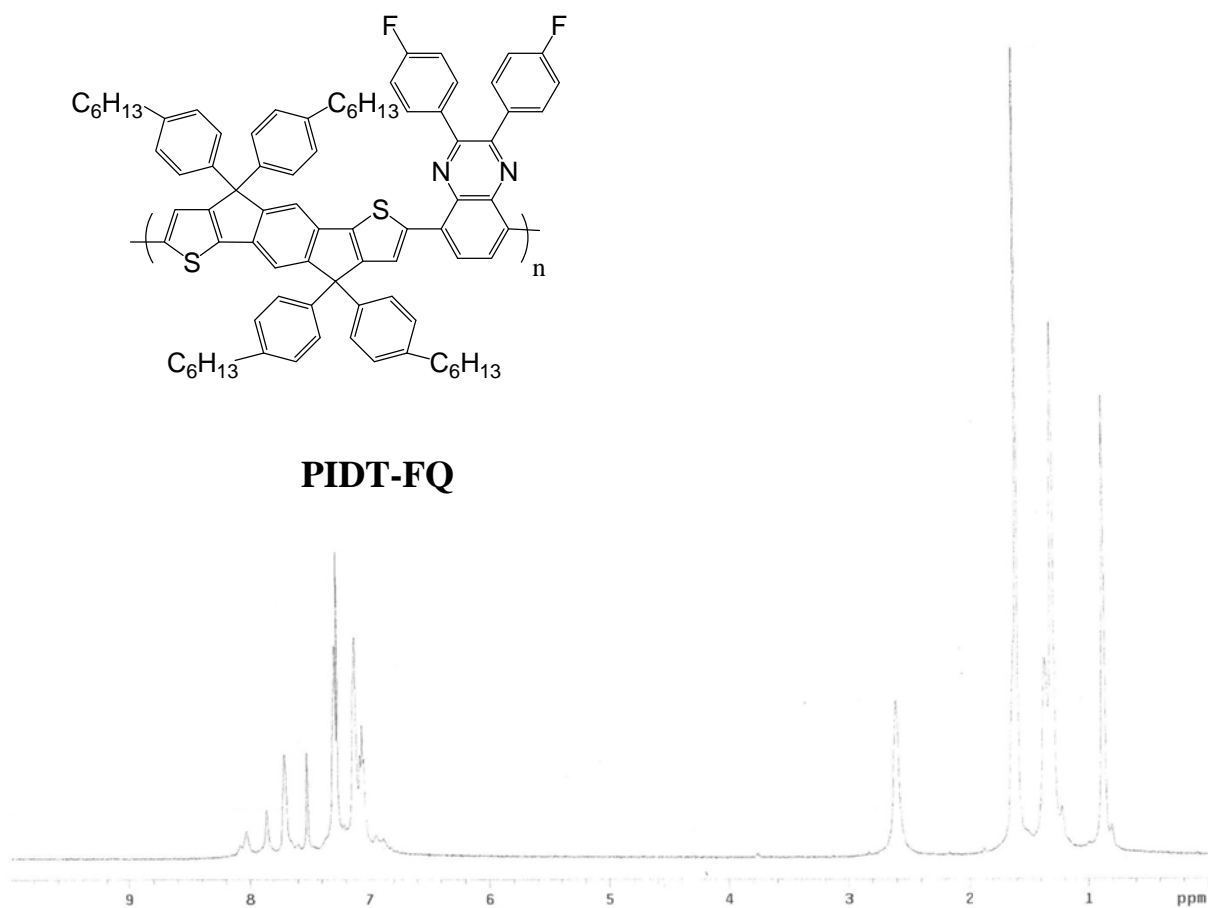

Figure S1. <sup>1</sup>H-NMR spectrum of **PIDT-FQ**

Table S1. OPV parameters of devices based on PIDT-FQ polymer

| Condition                               | $J_{sc}$<br>(mA/cm <sup>2</sup> ) | $V_{oc}$<br>(V) | FF<br>(%) | PCE<br>(%) |
|-----------------------------------------|-----------------------------------|-----------------|-----------|------------|
| <i>TT only</i>                          | 8.9                               | 0.89            | 53.4      | 4.2        |
| <i>Thermal Annealing</i>                | 8.9                               | 0.89            | 53.6      | 4.2        |
| <i>Mixture solvent<br/>CB/DCB (1/1)</i> | 8.9                               | 0.86            | 46.1      | 3.5        |
| <i>CB/DCB (1/1) +SA</i>                 | 8.7                               | 0.86            | 46.8      | 3.5        |
| <i>Additive(1.25% OT)</i>               | 6.9                               | 0.88            | 51.4      | 3.1        |
| <i>Additive(1.25% OT)+SA</i>            | 8.7                               | 0.88            | 50.6      | 3.9        |
| <i>Additive(1 % CN)</i>                 | 9.22                              | 0.85            | 48.8      | 3.8        |
| <i>Additive(1 % CN )+SA</i>             | 9.31                              | 0.87            | 52.9      | 4.3        |

All devices were made using thermal treatment (**TT**) process. 1,8-octanedithiol: OT, chloro-naphthalene: CN
